# Supplementary material for: Effect of N ancillary ligands on the structure, nuclearity and magnetic behavior of Cu(ii)–pyrazolecarboxylate complexes
Source: Royal Society of Chemistry journal article supplement (doi:10.1039/c6nj02338j), 2016-01-01
Supplement: c6nj02338j1.pdf [file c6nj02338j1.pdf]

## Electronic Supplementary Information (ESI)

Effect of N ancillary ligands on the structure, nuclearity and magnetic  
behavior of Cu(II)-pyrazolecarboxylate complexes

Meiling Cheng,<sup>a</sup> Lin Sun,<sup>a</sup> Wei Han,<sup>a</sup> Shen Wang,<sup>a</sup> Qi Liu,<sup>\*ab</sup> Xiaoqiang Sun,<sup>a</sup> Haitao Xi<sup>\*a</sup>

<sup>a</sup> *School of Petrochemical Engineering and Jiangsu Key Laboratory of Advanced Catalytic  
Materials and Technology, Changzhou University, Changzhou 213164, P. R. China*

<sup>b</sup> *State Key Laboratory of Coordination Chemistry, Nanjing University, Nanjing, Jiangsu 210093,  
P. R. China*

## Table of Contents

|                                                                                                                                                                                                                                                                             |     |
|-----------------------------------------------------------------------------------------------------------------------------------------------------------------------------------------------------------------------------------------------------------------------------|-----|
| Figure S1 The infrared spectra of complexes <b>1–4</b> .                                                                                                                                                                                                                    | S3  |
| Figure S2 The 3D supramolecular structure of complex <b>1</b> viewing along the <i>a</i> -axis. Hydrogen bonds are indicated by dash lines, only hydrogen atoms involved in the hydrogen bonds are shown.                                                                   | S3  |
| Figure S3. The 2D layer of the complex <b>2</b> . Only hydrogen atoms involved in the hydrogen bonds are shown. Hydrogen bonds are indicated by dashed lines.                                                                                                               | S4  |
| Figure S4. The 3D network of <b>2</b> . Only hydrogen atoms involved in the hydrogen bonds are shown. Hydrogen bonds are indicated by dashed lines, the dicopper units are shown in the same color.                                                                         | S4  |
| Figure S5. The 3D network of <b>3</b> view along the <i>a</i> -axis. Only hydrogen atoms involved in the hydrogen bonds are shown. Hydrogen bonds are indicated by dashed lines, the 2D layers are shown in the same color.                                                 | S4  |
| Figure S6 The boat conformational 9-membered ring in <b>4</b> .                                                                                                                                                                                                             | S5  |
| Figure S7 The C–H $\cdots\pi$ interactions and intramolecular $\pi\cdots\pi$ interactions in <b>4</b> . Only hydrogen atoms involved in C–H $\cdots\pi$ interactions are shown, $\pi\cdots\pi$ interactions and C–H $\cdots\pi$ interactions are indicated by dashed lines. | S5  |
| Figure S8 The PXRD spectra of <b>1–4</b> .                                                                                                                                                                                                                                  | S5  |
| Figure S9 The TG-traces for complexes <b>1–4</b> .                                                                                                                                                                                                                          | S6  |
| Table S1. Selected bond lengths (Å) and angles (°) in <b>1</b> .                                                                                                                                                                                                            | S6  |
| Table S2. Bond lengths (Å) and angles (°) of hydrogen bonds in <b>1</b> .                                                                                                                                                                                                   | S7  |
| Table S3. Selected bond lengths (Å) and angles (°) in <b>2</b> .                                                                                                                                                                                                            | S7  |
| Table S4. Bond lengths (Å) and angles (°) of hydrogen bonds in <b>2</b> .                                                                                                                                                                                                   | S7  |
| Table S5. Selected bond lengths (Å) and angles (°) in <b>3</b> .                                                                                                                                                                                                            | S8  |
| Table S6. Bond lengths (Å) and angles (°) of hydrogen bonds in <b>3</b> .                                                                                                                                                                                                   | S8  |
| Table S7. Selected bond lengths (Å) and angles (°) in <b>4</b> .                                                                                                                                                                                                            | S9  |
| Table S8. Bond lengths (Å) and angles (°) of hydrogen bonds and C–H $\cdots\pi$ interactions in <b>4</b> .                                                                                                                                                                  | S10 |

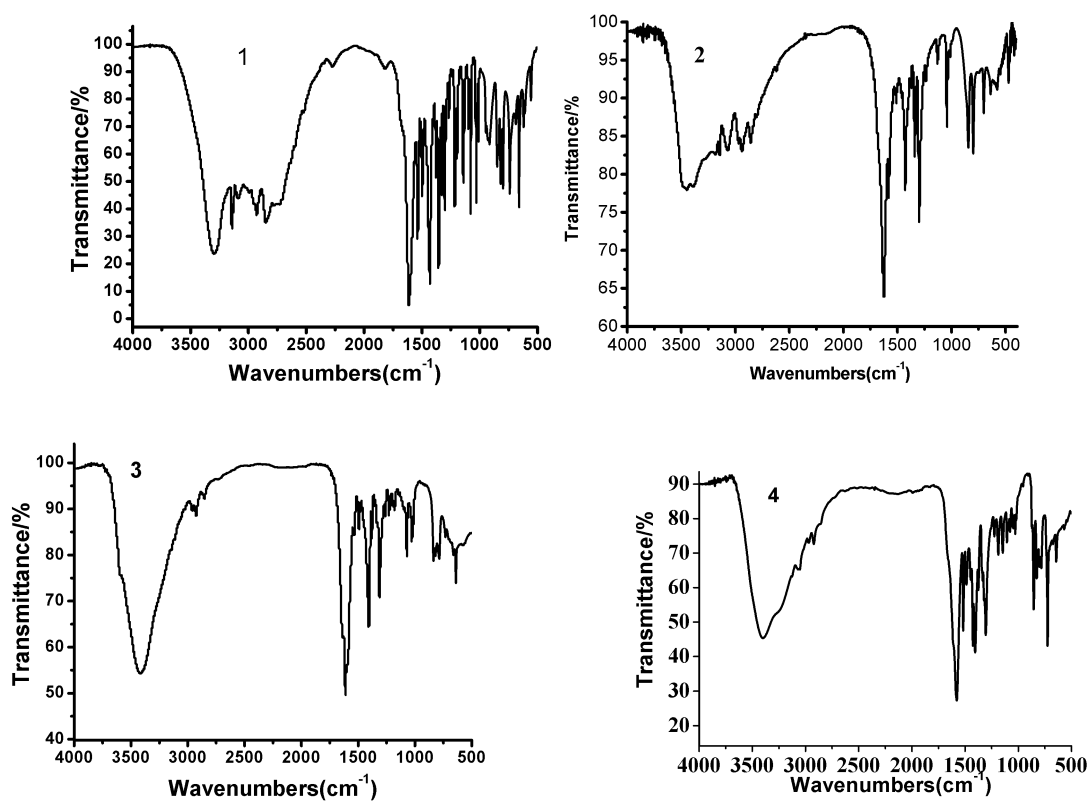

Figure S1 The infrared spectra of complexes 1–4.

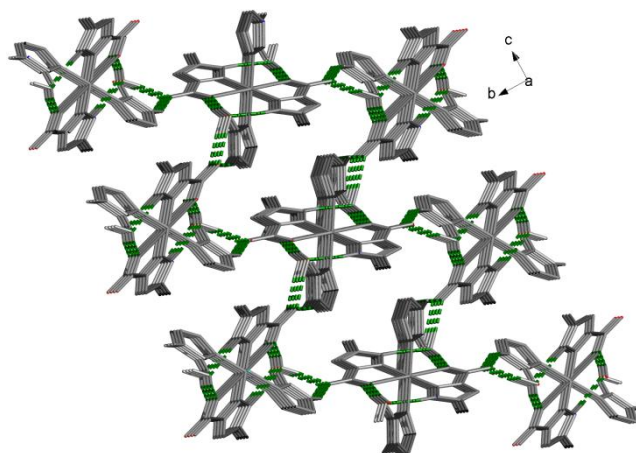

Figure S2 The 3D supramolecular structure of complex 1 viewing along the *a*-axis. Hydrogen bonds are indicated by dash lines, only hydrogen atoms involved in the hydrogen bonds are shown.

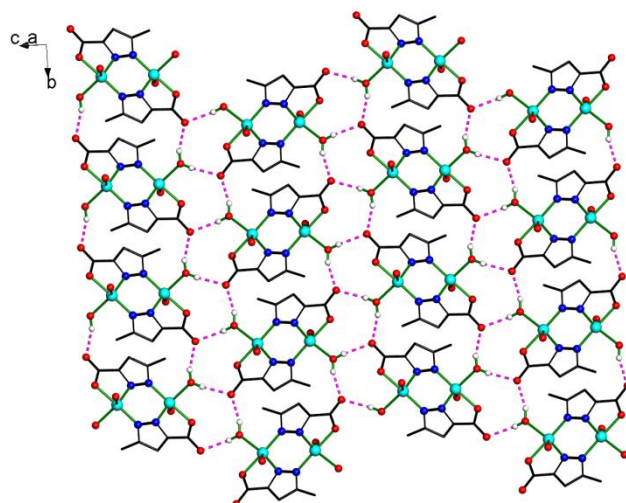

Figure S3. The 2D layer of the complex **2**. Only hydrogen atoms involved in the hydrogen bonds are shown. Hydrogen bonds are indicated by dashed lines.

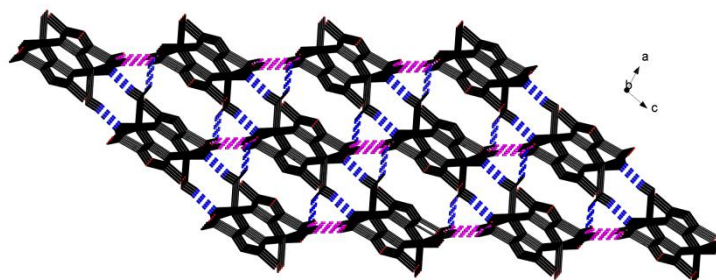

Figure S4. The 3D network of **2**. Only hydrogen atoms involved in the hydrogen bonds are shown. Hydrogen bonds are indicated by dashed lines, the dicopper units are shown in the same color.

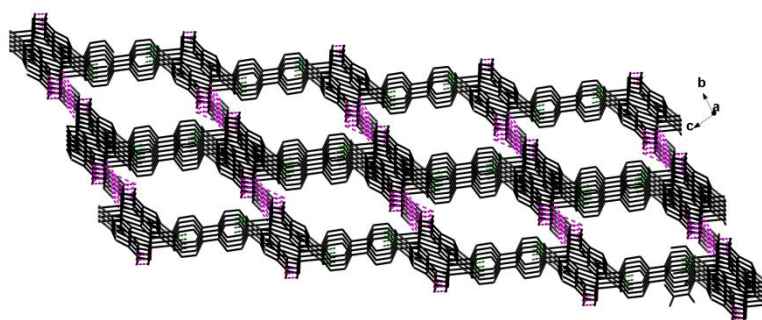

Figure S5. The 3D network of **3** view along the *a*-axis. Only hydrogen atoms involved in the hydrogen bonds are shown. Hydrogen bonds are indicated by dashed lines, the 2D layers are shown in the same color.

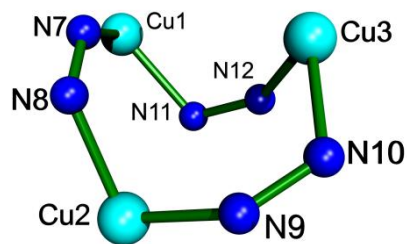

Figure S6 The boat conformational 9-membered ring in **4**.

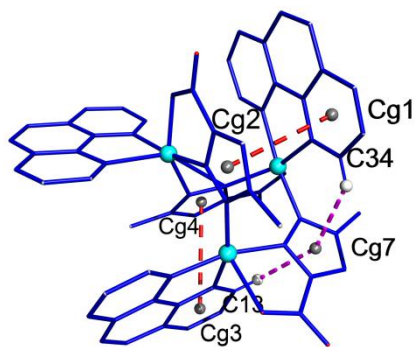

Figure S7 The C–H $\cdots\pi$  interactions and intramolecular  $\pi\cdots\pi$  interactions in **4**. Only hydrogen atoms involved in C–H $\cdots\pi$  interactions are shown,  $\pi\cdots\pi$  interactions and C–H $\cdots\pi$  interactions are indicated by dashed lines.

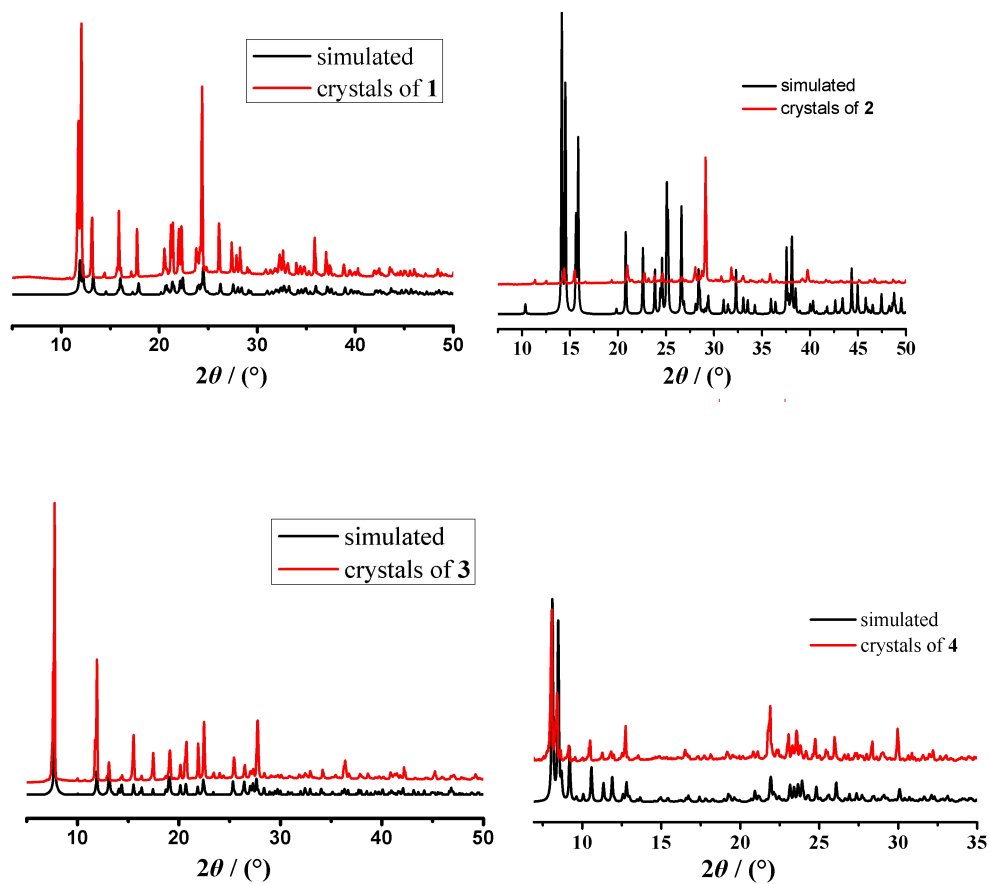

Figure S8 The PXRD spectra of **1–4**.

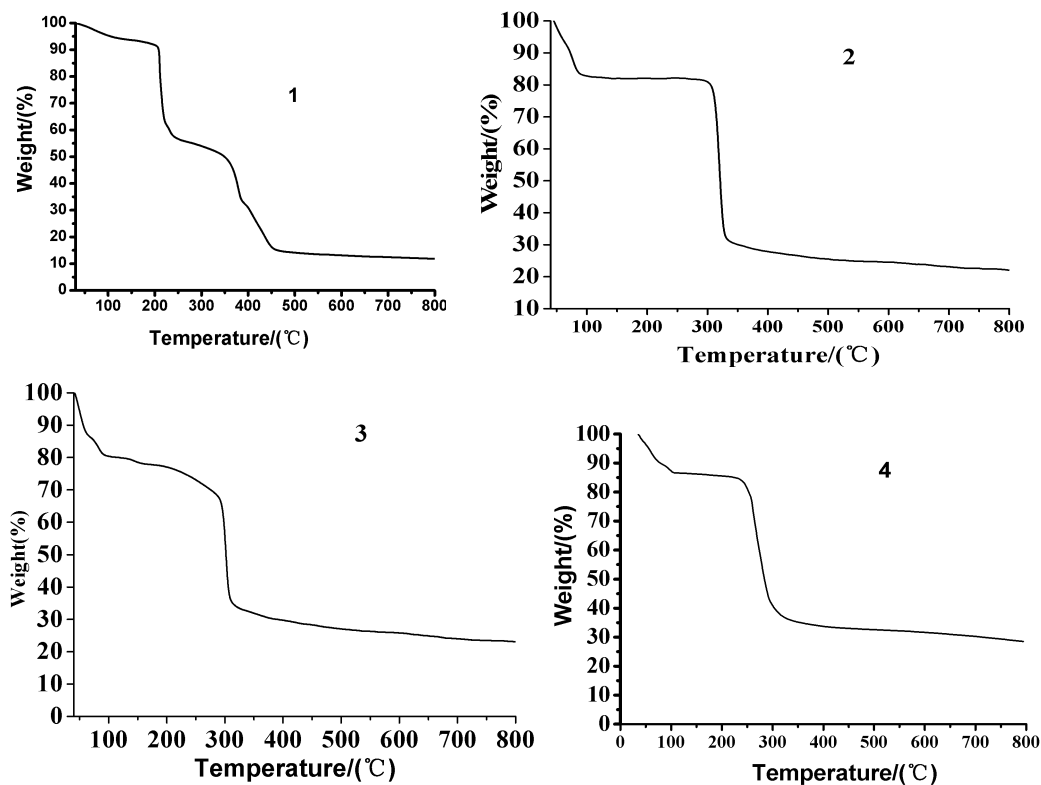

Figure S9 The TG-traces for complexes 1–4.

Table S1. Selected bond lengths (Å) and angles (°) in **1**.

|            |            |             |            |
|------------|------------|-------------|------------|
| Cu1–N3     | 2.0111(15) | Cu1–N1      | 2.0266(13) |
| Cu1–O1     | 2.3840(14) |             |            |
| N3–Cu1–N1  | 90.35(6)   | N3–Cu1–N1A  | 89.66(6)   |
| N3A–Cu1–N1 | 89.66(6)   | N3A–Cu1–N1A | 92.01 (6)  |
| N3–Cu1–O1  | 92.01 (6)  | N3–Cu1–O1A  | 87.99 (6)  |
| N1–Cu1–O1  | 74.16(5)   | N1–Cu1–O1A  | 105.84 (5) |
| O1–Cu1–N3A | 87.99 (6)  | O1A–Cu1–N3A | 92.01(6)   |
| O1–Cu1–N1A | 105.84(5)  | O1A–Cu1–N1A | 74.16 (5)  |

Symmetry codes: A:  $-x, -y, -z$ .

Table S2. Bond lengths (Å) and angles (°) of hydrogen bonds in **1**.

| D–H ⋯ A            | D–H / Å | H ⋯ A / Å | D ⋯ A / Å | D–H ⋯ A / (°) |
|--------------------|---------|-----------|-----------|---------------|
| N(2)–H(2) ⋯ O(3B)  | 0.86    | 1.89      | 2.742(2)  | 167           |
| O(3)–H(3X) ⋯ O(2)  | 0.93    | 1.79      | 2.702(2)  | 163           |
| O(3)–H(3Y) ⋯ O(1C) | 0.83    | 1.90      | 2.706(2)  | 164           |
| N(4)–H(4) ⋯ O(2D)  | 0.98    | 1.83      | 2.738(3)  | 151           |
| C(6)–H(6) ⋯ O(3D)  | 0.93    | 2.55      | 3.295(2)  | 137           |

Symmetry codes: B:  $1/2 - x, -1/2 - y, 1/2 - z$ ; C:  $1/2 + x, 1/2 - y, 1/2 + z$ ; D:  $-1/2 + x, -1/2 + y, 1/2 - z$ .

Table S3. Selected bond lengths (Å) and angles (°) in **2**.

|            |            |            |            |
|------------|------------|------------|------------|
| Cu1–N2A    | 1.928(3)   | Cu1–O3     | 2.082(3)   |
| Cu1–N1     | 1.991(3)   | Cu1–O4     | 2.118(3)   |
| Cu1–O1     | 1.976(2)   |            |            |
| N2A–Cu1–O1 | 177.33(10) | N1–Cu1–O3  | 122.96(12) |
| N2A–Cu1–N1 | 100.62(11) | N2A–Cu1–O4 | 95.04(11)  |
| O1–Cu1–N1  | 82.00(10)  | O1–Cu1–O4  | 83.26(10)  |
| N2A–Cu1–O3 | 95.27(11)  | N1–Cu1–O4  | 115.82(12) |
| O1–Cu1–O3  | 83.68(11)  | O3–Cu1–O4  | 116.79(13) |

Symmetry code: A:  $1 - x, 2 - y, 1 - z$ .

Table S4. Bond lengths (Å) and angles (°) of hydrogen bonds in **2**.

| D–H ⋯ A      | D–H  | H ⋯ A | D ⋯ A    | D–H ⋯ A |
|--------------|------|-------|----------|---------|
| O3–H3X ⋯ O2B | 0.81 | 2.03  | 2.824(4) | 168     |
| O3–H3Y ⋯ O2C | 0.85 | 1.97  | 2.797(4) | 162     |
| O4–H4X ⋯ O1D | 0.90 | 1.95  | 2.814(4) | 161     |
| O4–H4Y ⋯ O2E | 0.88 | 1.99  | 2.755(4) | 144     |

Symmetry codes: B:  $1/2 - x, 1/2 + y, 1/2 - z$ ; C:  $x, 1 + y, z$ ; D:  $1 - x, y, 1/2 - z$ ; E:  $1/2 + x, 1/2 + y, z$ .

Table S5. Selected bond lengths (Å) and angles (°) in **3**.

|            |            |            |            |
|------------|------------|------------|------------|
| Cu1–N2A    | 1.978(3)   | Cu1–N1     | 1.994(3)   |
| Cu1–O1     | 2.018(3)   | Cu1–N3     | 2.052(3)   |
| Cu1–O3     | 2.217(3)   |            |            |
| N2A–Cu1–N1 | 98.70(13)  | N2A–Cu1–O1 | 177.69(13) |
| N1–Cu1–O1  | 81.46(13)  | N2A–Cu1–N3 | 94.46(14)  |
| N1–Cu1–N3  | 141.78(14) | O1–Cu1–N3  | 86.78(13)  |
| N2A–Cu1–O3 | 93.30(14)  | N1–Cu1–O3  | 109.52(15) |
| O1–Cu1–O3  | 84.48(13)  | N3–Cu1–O3  | 105.31(15) |

Symmetry codes: A:  $-x + 2, -y, -z$ .Table S6. Bond lengths (Å) and angles (°) of hydrogen bonds in **3**.

| D–H ⋯ A      | D–H / Å | H ⋯ A / Å | D ⋯ A / Å | D–H ⋯ A / (°) |
|--------------|---------|-----------|-----------|---------------|
| O3–H3X ⋯ O2B | 0.79    | 2.06      | 2.761(6)  | 148           |
| O3–H3Y ⋯ O1C | 0.97    | 2.00      | 2.879(5)  | 149           |
| O3–H3Y ⋯ O2C | 0.97    | 2.55      | 3.431(5)  | 151           |

Symmetry codes: B:  $1 + x, y, z$ ; C:  $2 - x, 1 - y, -z$ .



Table S7. Selected bond lengths (Å) and angles (°) in **4**.

|                 |            |             |            |
|-----------------|------------|-------------|------------|
| Cu1–N7          | 1.953(4)   | Cu1–N1      | 2.030(4)   |
| Cu1–N12         | 1.988(4)   | Cu1–N2      | 2.208(4)   |
| Cu1–O1          | 2.027(3)   | Cu2–N9      | 1.959(4)   |
| Cu2–N8          | 1.972(4)   | Cu2–N4      | 2.013(4)   |
| Cu2–N3          | 2.054(4)   | Cu2–O3      | 2.286(3)   |
| Cu3–N10         | 1.965(4)   | Cu3–N5      | 2.011(4)   |
| Cu3–N6          | 2.057(4)   | Cu3–N11     | 2.073(4)   |
| Cu3–O5          | 2.193(3)   |             |            |
| N7–Cu1–N12      | 96.09(17)  | N9–Cu2–O3   | 78.04(15)  |
| N7–Cu1–O1       | 81.85(16)  | N8–Cu2–O3   | 112.97(15) |
| N12–Cu1–O1      | 148.76(17) | N4–Cu2–O3   | 90.11(15)  |
| N7–Cu1–N1       | 171.59(18) | N9–Cu2–N8   | 94.94(17)  |
| N12–Cu1–N1      | 91.33(17)  | N3–Cu2–O3   | 89.75(15)  |
| O1–Cu1–N1       | 89.75(17)  | N10–Cu3–N5  | 170.93(18) |
| N7–Cu1–N2       | 101.77(18) | N10–Cu3–N6  | 91.48(17)  |
| N12–Cu1–N2      | 117.97(18) | N5–Cu3–N6   | 79.76(18)  |
| O(1)–Cu(1)–N(2) | 92.78(17)  | N10–Cu3–N11 | 95.34(16)  |
| N(1)–Cu(1)–N(2) | 78.07(18)  | N5–Cu3–N11  | 93.24(17)  |
| N9–Cu2–N4       | 166.73(17) | N6–Cu3–N11  | 145.42(17) |
| N8–Cu2–N4       | 95.20(17)  | N10–Cu3–O5  | 92.11(16)  |
| N9–Cu2–N3       | 92.84(17)  | N5–Cu3–O5   | 92.64(17)  |
| N8–Cu2–N3       | 157.05(16) | N6–Cu3–O5   | 136.39(16) |
| N4–Cu2–N3       | 81.01(17)  | N11–Cu3–O5  | 77.28(15)  |

Table S8. Bond lengths (Å) and angles (°) of hydrogen bonds and C–H··· $\pi$  interactions in **4**.

| D–H···A/Cg       | D–H  | H···A/Cg | D···A/Cg  | D–H···A/Cg |
|------------------|------|----------|-----------|------------|
| O7–H0BA···O8F    | 0.85 | 2.08     | 2.855(6)  | 151        |
| O7–H2BA···O2     | 0.85 | 1.98     | 2.752(5)  | 151        |
| O8–H3BA···O7D    | 0.83 | 2.24     | 2.855(6)  | 131        |
| O8–H4BA···O3     | 0.83 | 1.94     | 2.776(5)  | 175        |
| O9–H5BA···O6G    | 0.85 | 1.91     | 2.734(6)  | 163        |
| O9–H6BA···O4A    | 0.85 | 1.94     | 2.779(7)  | 168        |
| O10–H8BA···O4F   | 0.85 | 1.95     | 2.796(6)  | 173        |
| O10–H7BA···O7    | 0.85 | 2.07     | 2.908(7)  | 167        |
| O11–H0CA···O7    | 0.85 | 2.05     | 2.858(8)  | 157        |
| O11–H9BA···O6G   | 0.85 | 1.98     | 2.820(7)  | 172        |
| O12–H4CA···O9E   | 0.85 | 1.88     | 2.704(9)  | 163        |
| O12–H5CA···O10   | 0.85 | 1.97     | 2.779(9)  | 160        |
| O13–H13CA···O14A | 0.85 | 1.99     | 2.744(11) | 148        |
| O14–H14A···O8C   | 0.81 | 2.13     | 2.921(10) | 171        |
| O14–H14B···O11B  | 0.81 | 1.99     | 2.730(10) | 152        |
| C5–H5···O4H      | 0.93 | 2.59     | 3.402(7)  | 146        |
| C17–Hk···O4I     | 0.93 | 2.42     | 3.325(6)  | 165        |
| C22–Ho···O12     | 0.93 | 2.33     | 3.124(9)  | 143        |
| C25–Hp···O13J    | 0.93 | 2.54     | 3.196(8)  | 128        |
| C27–Hr···O1J     | 0.93 | 2.57     | 3.486(7)  | 167        |
| C27–Hr···O2J     | 0.93 | 2.54     | 3.240(7)  | 133        |
| C34–Hw···Cg7     | 0.93 | 2.71     | 3.461(4)  | 138        |
| C13–Hh···Cg7     | 0.93 | 2.81     | 3.525(5)  | 134        |

Symmetry codes: A:  $1-x, -1/2+y, 1/2-z$ ; B:  $1-x, 1/2+y, 1/2-z$ ; C:  $-1+x, y, z$ ; D:  $2-x, 1/2$

$+y, 1/2-z$ ; E:  $1+x, y, z$ ; F:  $2-x, -1/2+y, 1/2-z$ ; G:  $x, 3/2-y, 1/2+z$ ; H:  $x, 3/2-y, -1/2+z$ ; I:

$2-x, 2-y, -z$ ; J:  $1-x, 1-y, -z$ .
